# Supplementary material for: Fabrication and Testing of Multi-Hierarchical Porous Scaffolds Designed for Bone Regeneration via Additive Manufacturing Processes
Source: MDPI journal article supplement (doi:10.3390/polym14194041), 2022-09-27
Supplement: s1 [file s1]

## Supplementary Material

**Table S1.** Parameters for the deposition of the copolymeric mixture on 3D substrate.

| Material     | Mixture deposition via dip-coating |        | Immersion cycles | Wrinkles patterns formation |             |
|--------------|------------------------------------|--------|------------------|-----------------------------|-------------|
|              | Speed (mm/s)                       |        |                  | Irradiation UV light        | Vacuum time |
|              | Input                              | Output |                  |                             |             |
| PLA          | 1.10                               | 0.45   | 2                | 30 s                        | 1 h         |
| PCL          | 1.10                               | 0.45   | 2                | 1 min                       | 2.5 h       |
| PCL/NaCl     | 1.10                               | 0.45   | 2                | 1:30 min                    | 2.5 h       |
| PCL/nHA      | 1.10                               | 0.45   | 2                | 1:30 min                    | 3 h         |
| PCL/nHA/NaCl | 1.10                               | 1.20   | 3                | 1:30 min                    | 3 h         |
| HIPS         | 1.10                               | 0.45   | 2                | 5 min                       | 8 h         |
| TPU          | 1.10                               | 1.10   | 3                | 1 min                       | 2 h         |

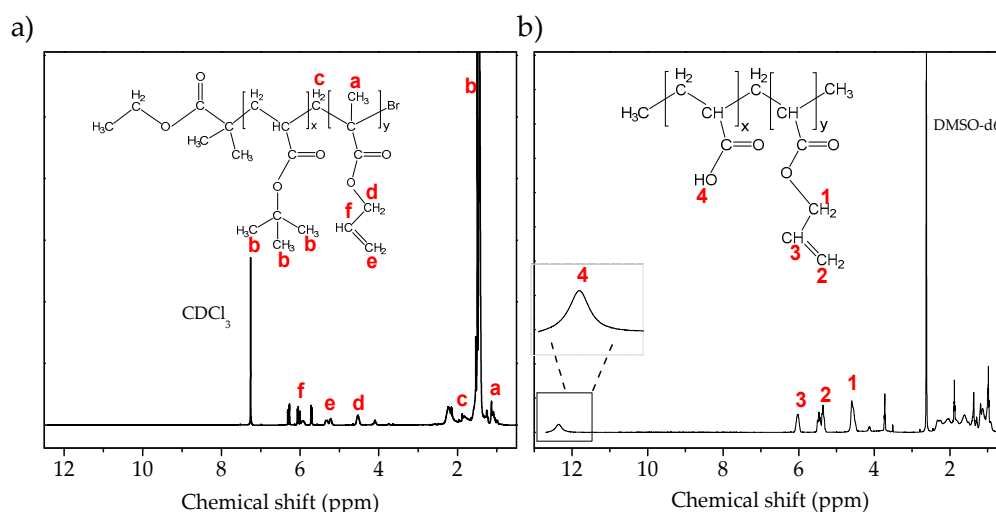

**Figure S1.**  $^1\text{H}$ -NMR and structure of the a) protected and b) unprotected copolymer in a mole ratio of 90:10.

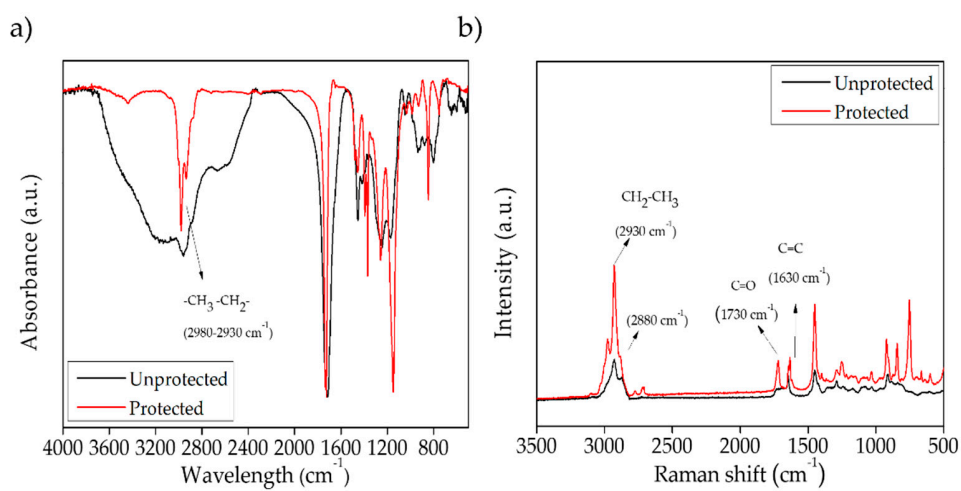

**Figure S2.** a) FT-IR, and b) Raman spectroscopy of unprotected and protected copolymers in a mole ratio of 90:10

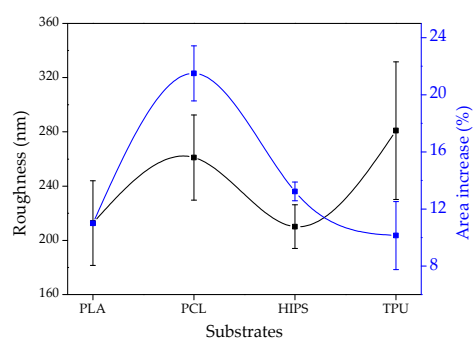

**Figure S3.** Graph roughness (line black) and area increase (line blue).

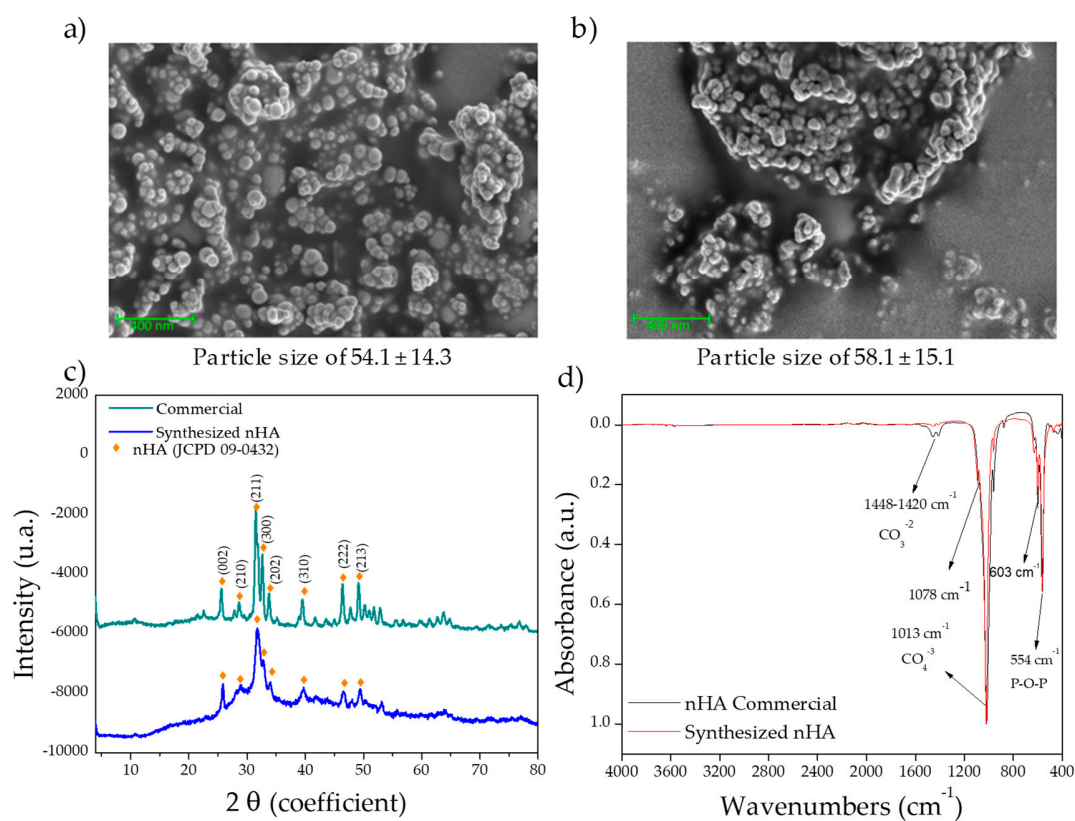

**Figure S4.** Analysis and characterization of synthesized and commercial nHA particles. a) FE-SEM commercial nHA. b) FE-SEM nHA synthesized. c) ATR-FTIR commercial nHA (line black) and synthesized (line red). d) Analysis XRD nHA commercial (line green) and synthesized (line blue).

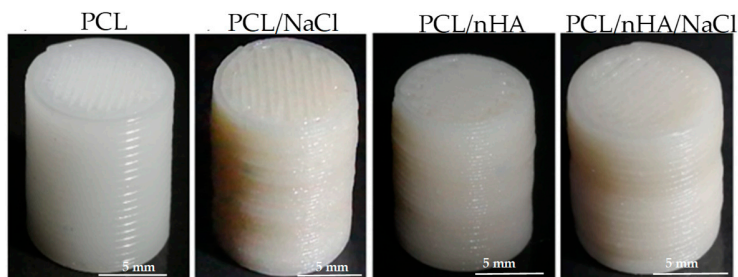

**Figure S5.** Different scaffolds printed in FDM.

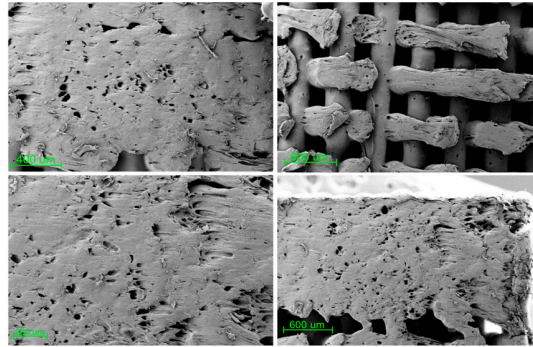

**Figure S6.** FE-SEM of the internal structure of the PCL/nHA/NaCl scaffolds with 14 days of leaching in different zones.

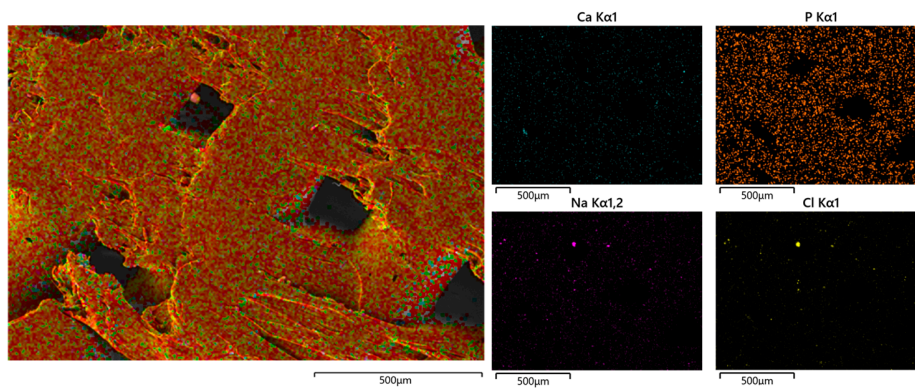

**Figure S7.** EDX measurements of the PCL/nHA/NaCl leached sample

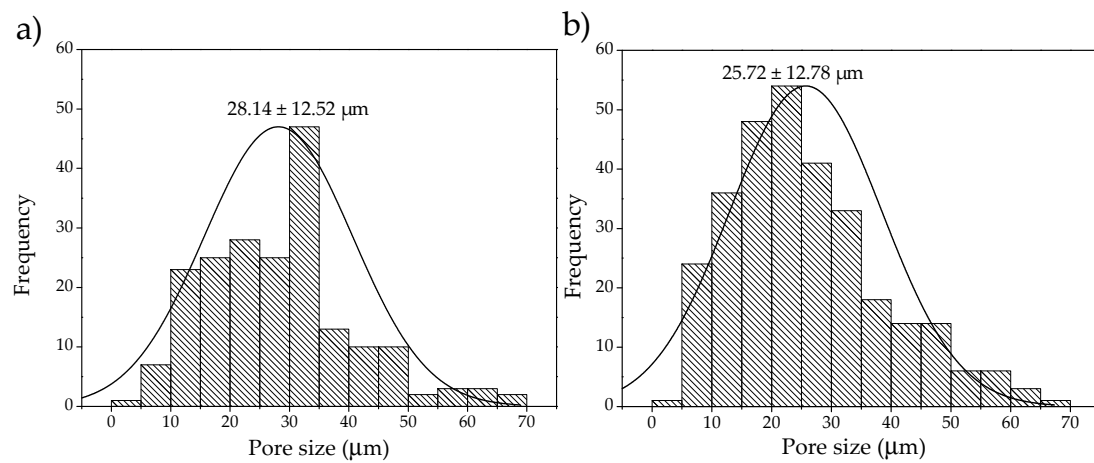

**Figure S8.** Histogram of pore size of the: a) PCL/NaCl and b) PCL/nHA/NaCl scaffolds.
